# Supplementary figures and images for: Tumour cell lysate-loaded dendritic cell vaccine induces biochemical and memory immune response in castration-resistant prostate cancer patients
Source: PubMed Central journal article supplement — Br J Cancer. 2013 Aug 29;109(6):1488–97. doi: 10.1038/bjc.2013.494 (PMC3777003; doi:10.1038/bjc.2013.494), 2013-08-29

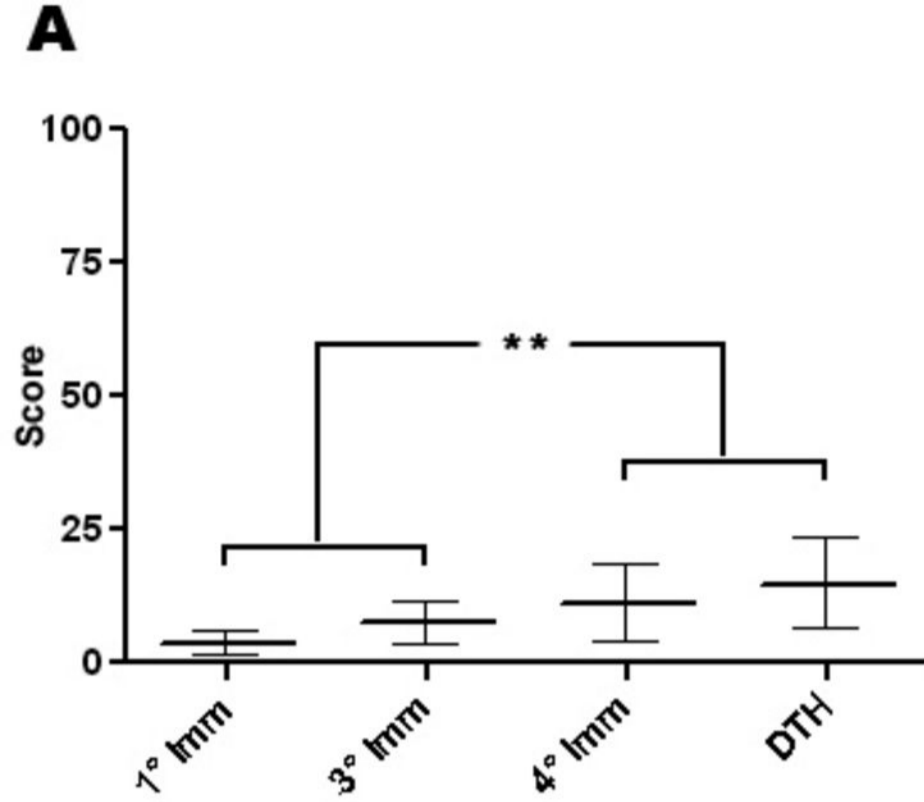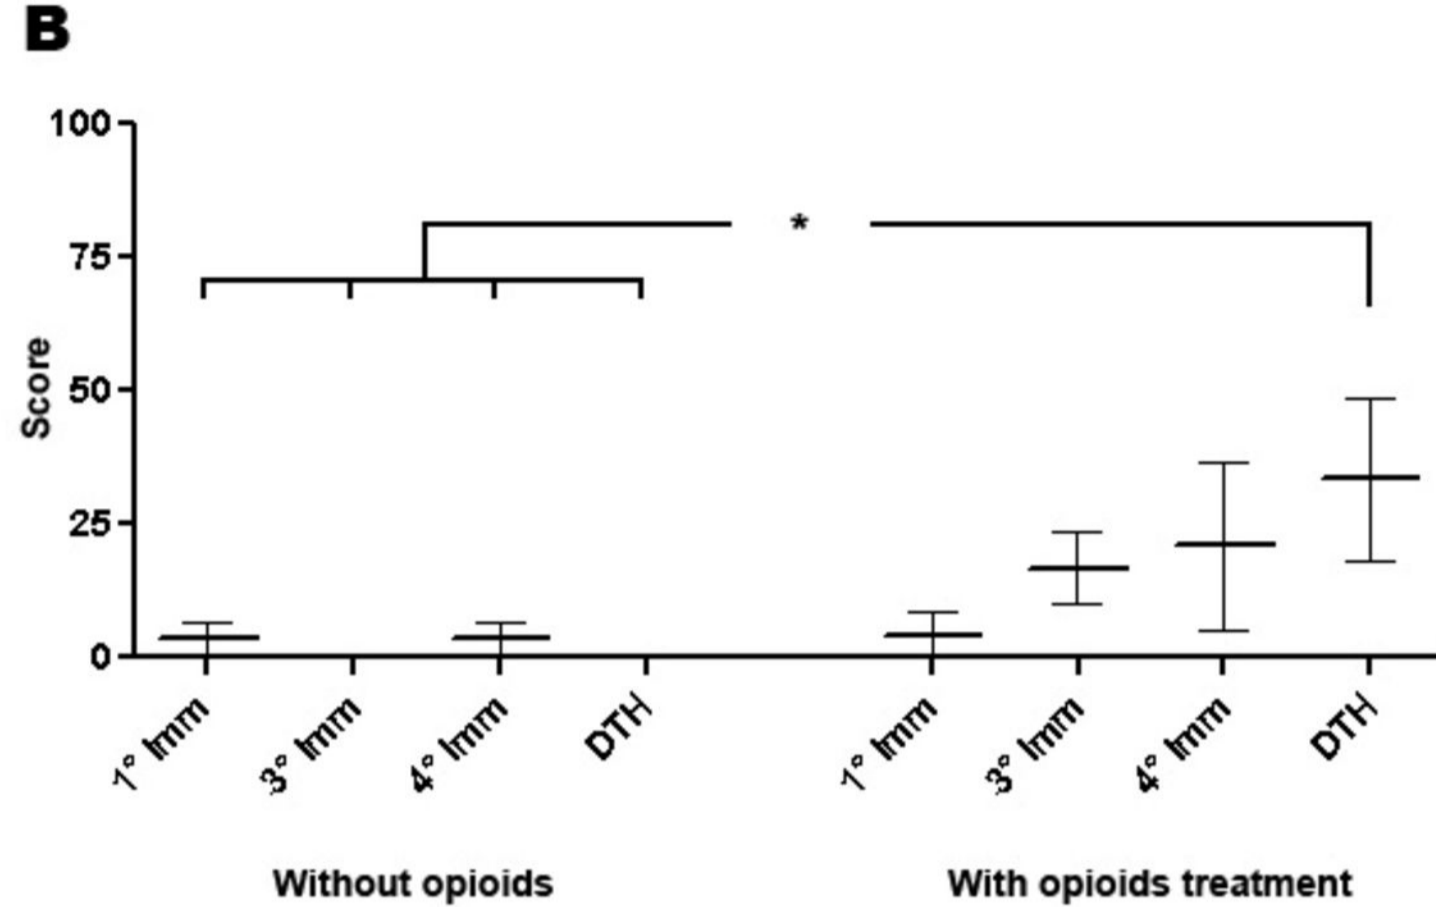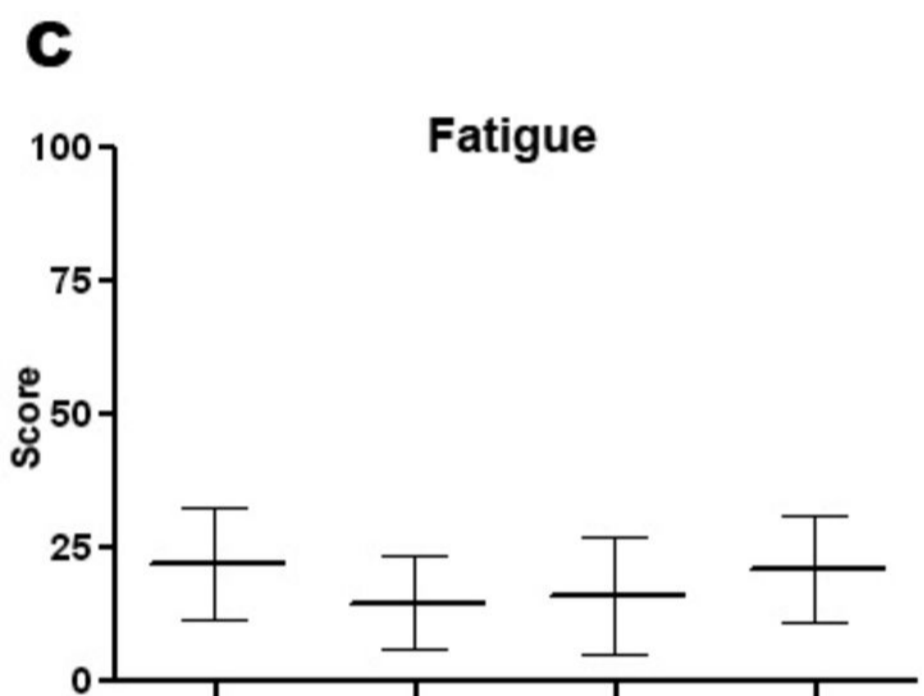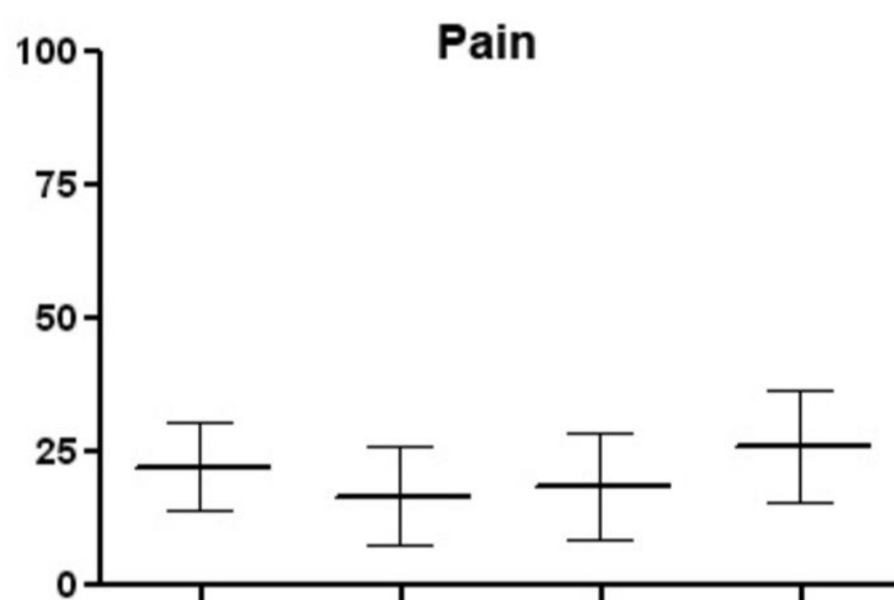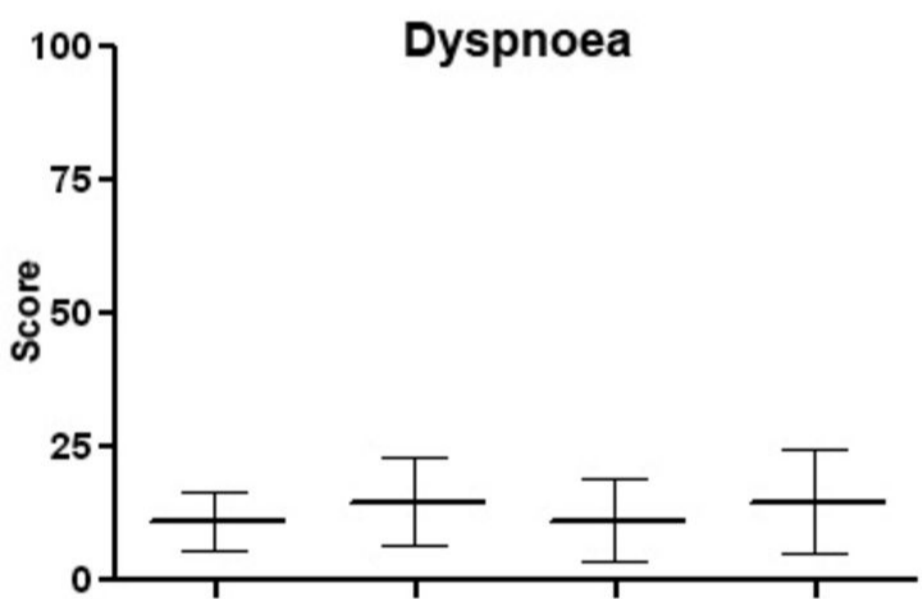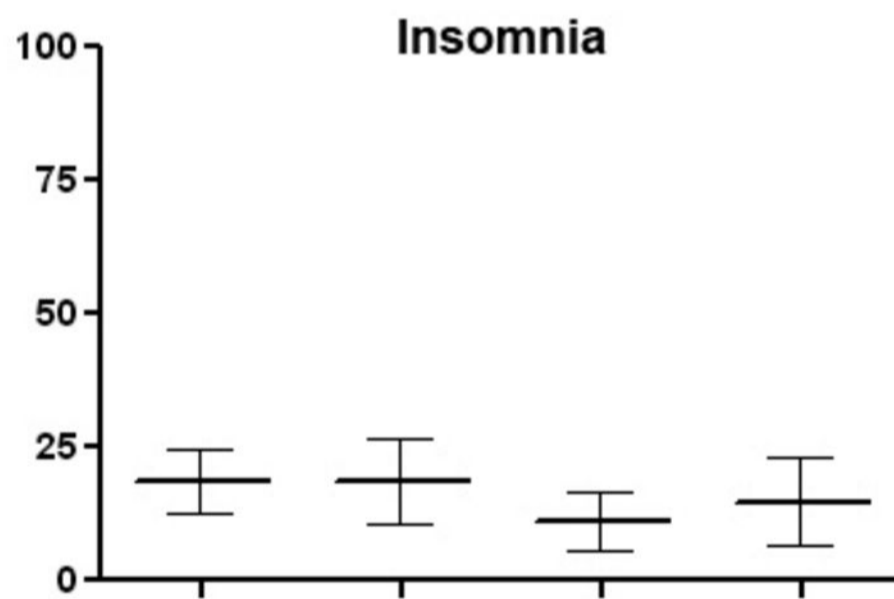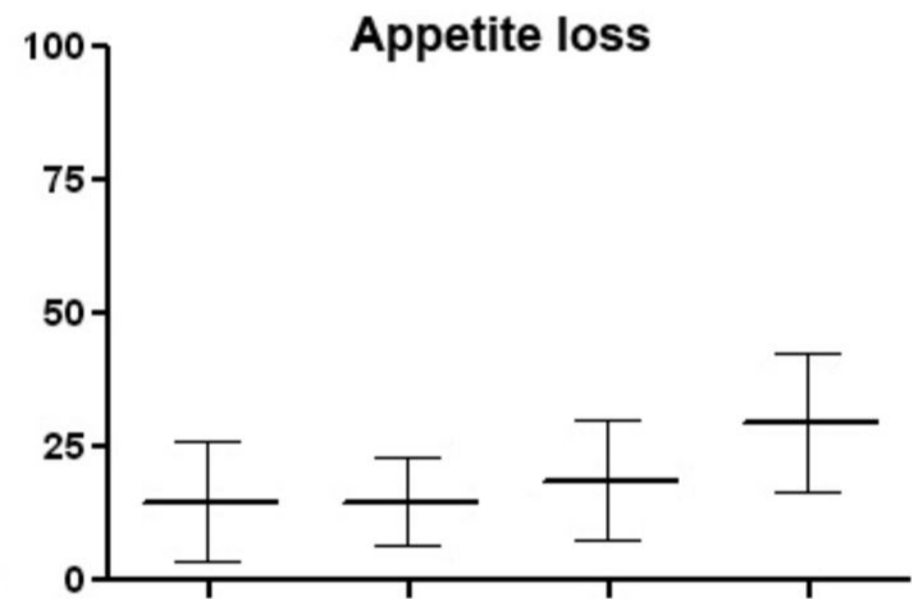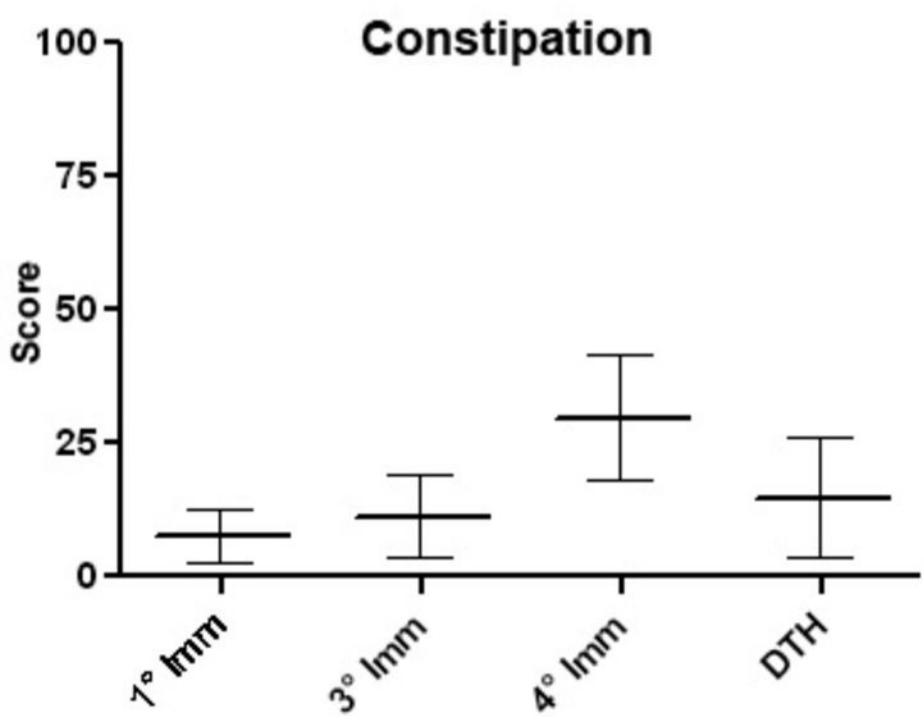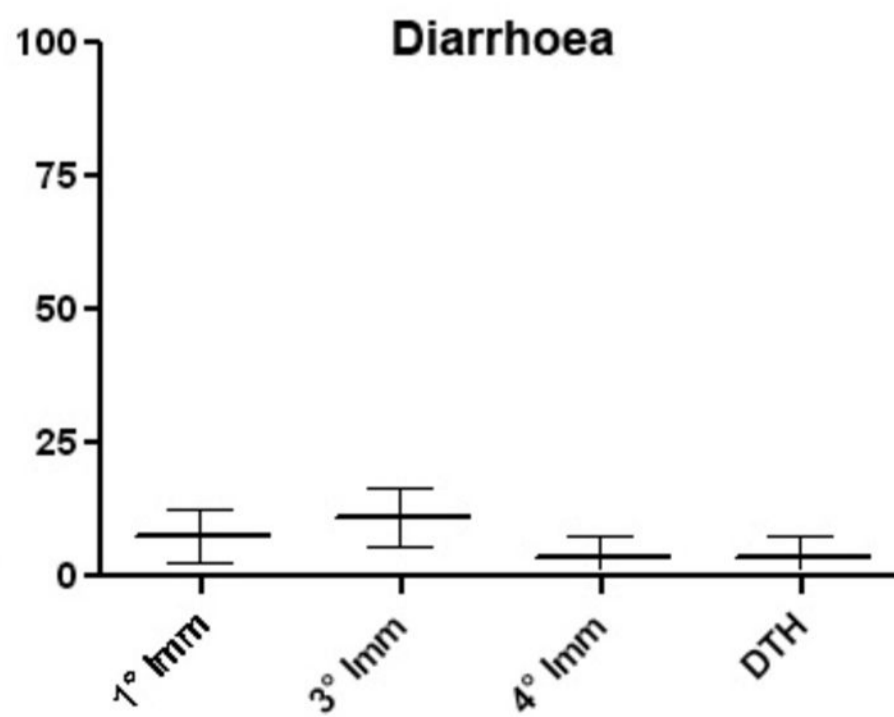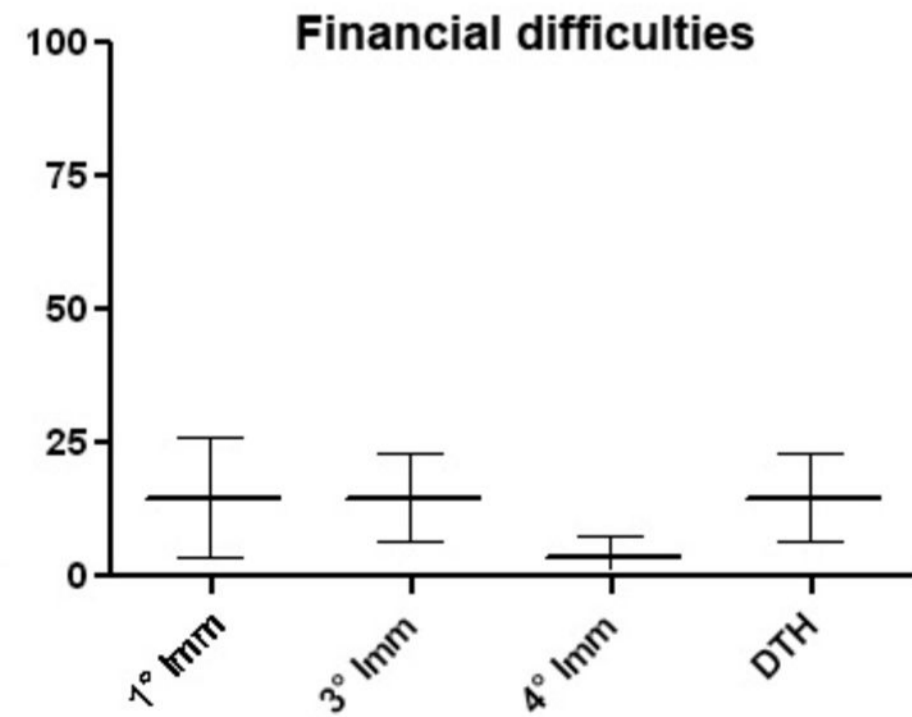

Supplement: bjc2013494x1.pdf [file bjc2013494x1.pdf]

Global Health Status

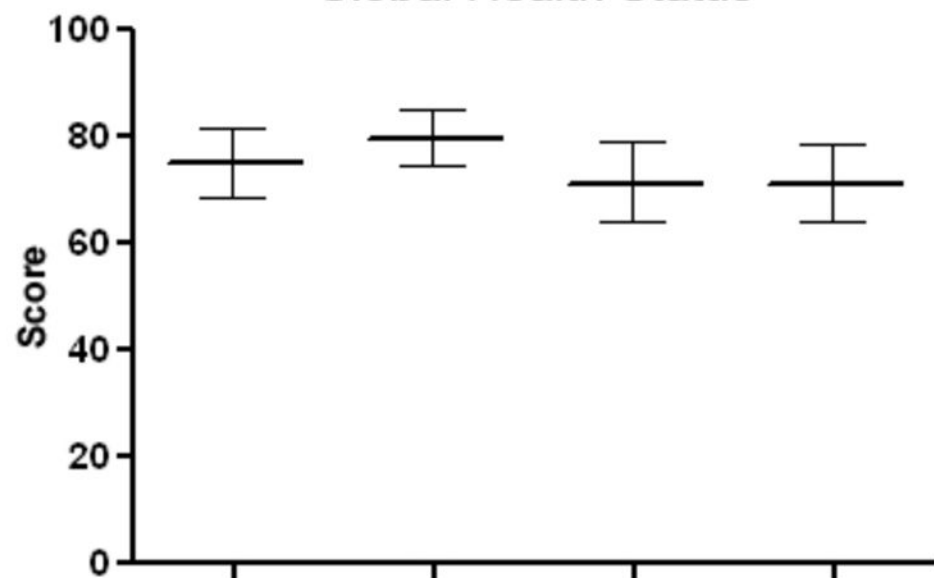

Physical

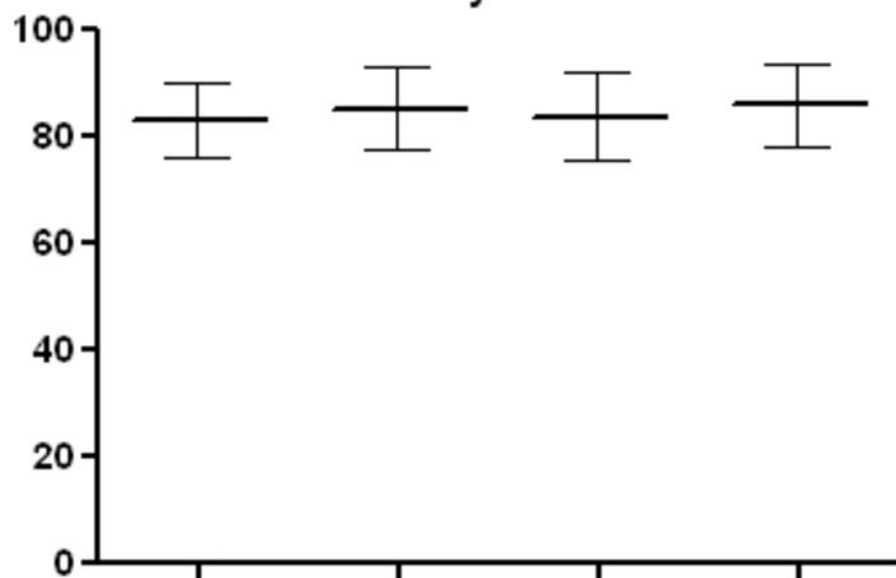

Role

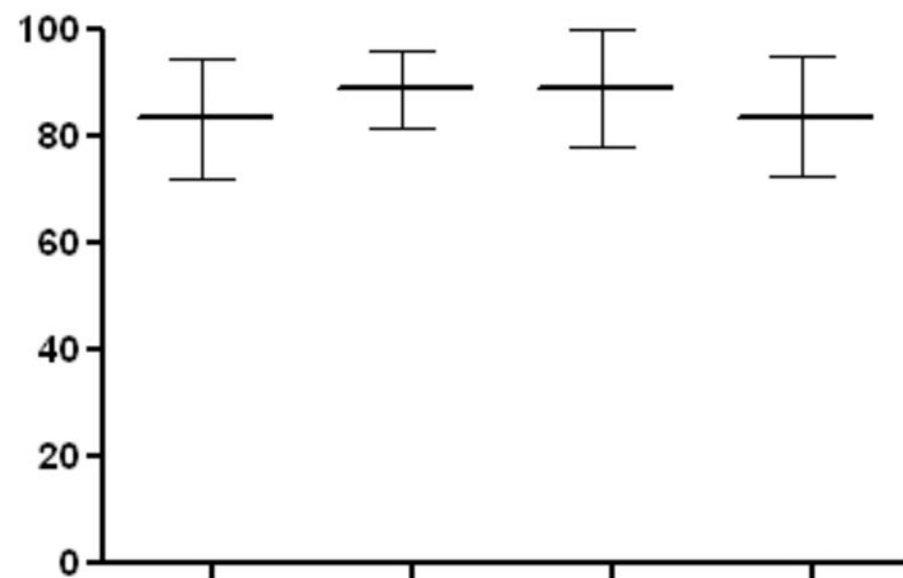

Emotional

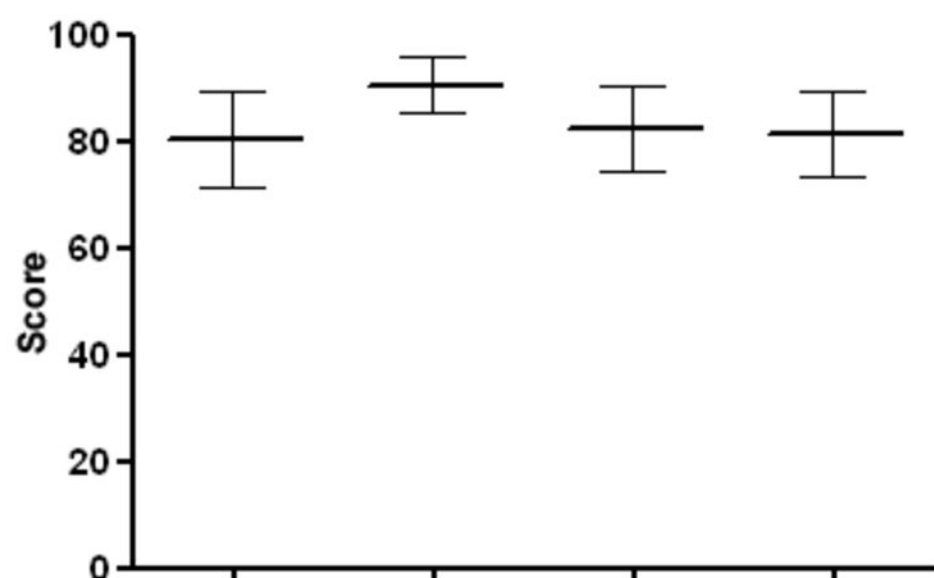

Cognitive

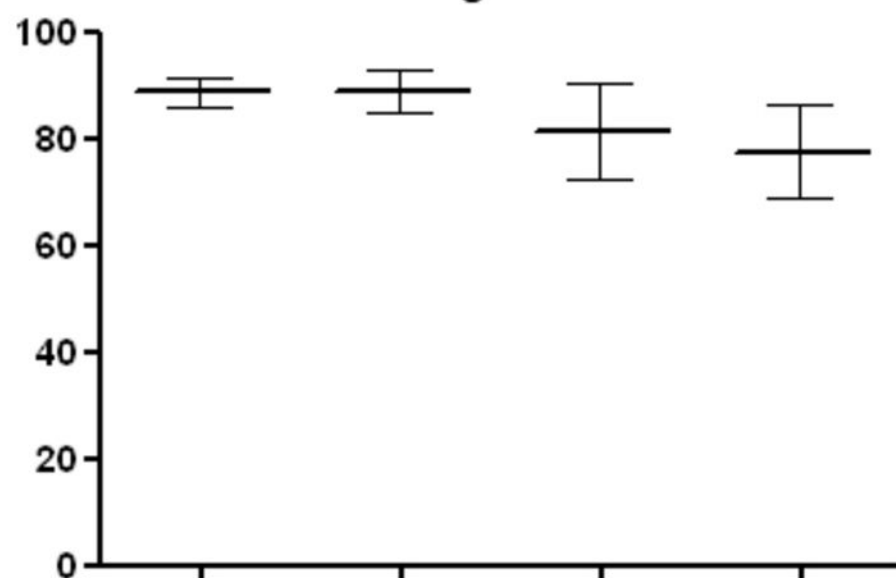

Social

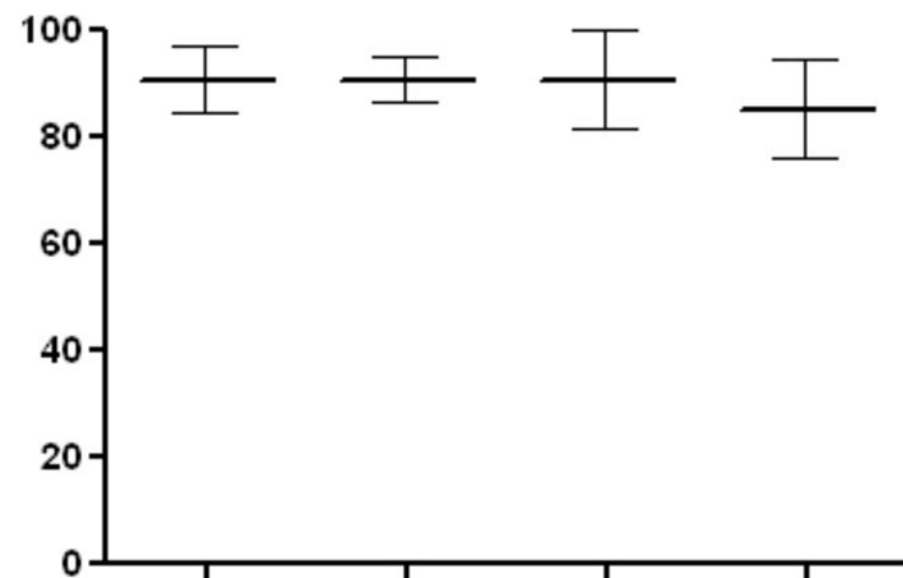

Supplement: bjc2013494x2.pdf [file bjc2013494x2.pdf]

**A****%CD8<sup>+</sup>CD45RO<sup>+</sup>**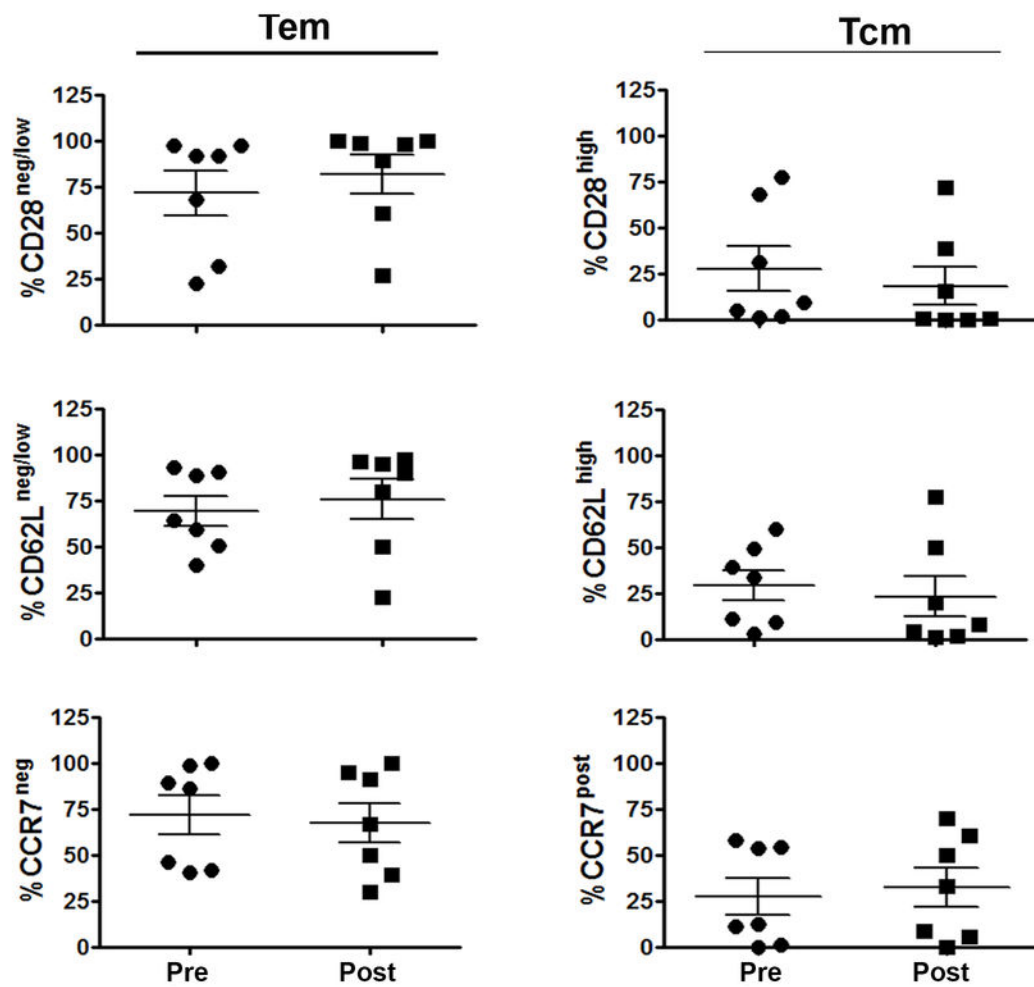**B****%CD8<sup>+</sup>CD45RO<sup>+</sup>**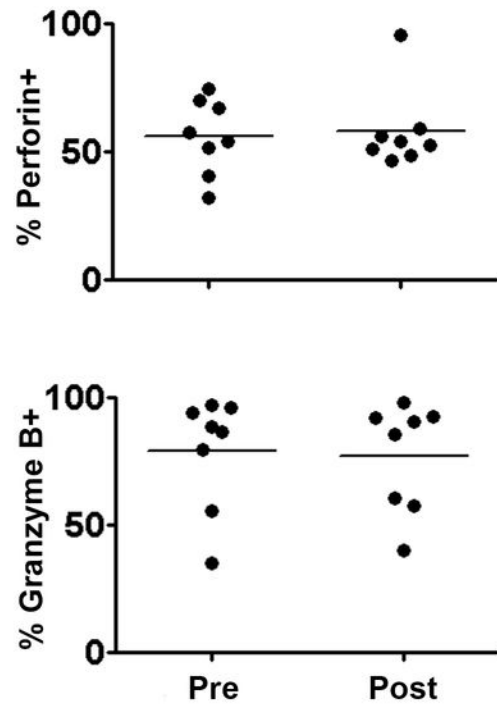

Supplement: bjc2013494x3.pdf [file bjc2013494x3.pdf]
